# Supplementary material for: Electronically modulated bimetallic telluride nanodendrites atop 2D nanosheets using a vanadium dopant enabling a bifunctional electrocatalyst for overall water splitting
Source: Royal Society of Chemistry journal article supplement (doi:10.1039/d4ta01929f), 2024-01-01
Supplement: d4ta01929f1.pdf [file d4ta01929f1.pdf]

## Supporting Information

### **Electronically modulated bimetallic telluride nano dendrites atop 2D nanosheets using a vanadium dopant enabling a bifunctional electrocatalyst for overall water splitting**

Ishwor Pathak<sup>a,b</sup>, Alagan Muthurasu<sup>a</sup>, Debendra Acharya<sup>a</sup>, Kisan Chhetri<sup>a</sup>, Bipeen Dahal<sup>c</sup>, Yagya Raj Rosyara<sup>a</sup>, Taewoo Kim<sup>a</sup>, Tae Hoon Ko<sup>a\*</sup>, Hak Yong Kim<sup>a,d\*</sup>

<sup>a</sup> Department of Nano Convergence Engineering, Jeonbuk National University, Jeonju, 54896, Republic of Korea

<sup>b</sup> Department of Chemistry, Amrit Campus, Tribhuvan University, Kathmandu 44613, Nepal

<sup>c</sup> Central Department of Chemistry, Tribhuvan University, Kathmandu 44613, Nepal

<sup>d</sup> Department of Organic Materials and Fiber Engineering, Jeonbuk National University, Jeonju 561-756, Republic of Korea

Corresponding Author's Email: [khy@jbnu.ac.kr](mailto:khy@jbnu.ac.kr) / [taehoon222@naver.com](mailto:taehoon222@naver.com)

#### **Materials**

Cobalt nitrate hexahydrate ( $\text{Co}(\text{NO}_3)_2 \cdot 6\text{H}_2\text{O}$ , 98.0%), sodium molybdate dihydrate ( $\text{Na}_2\text{MoO}_4 \cdot 2\text{H}_2\text{O}$ ,  $\geq 99.0\%$ ), vanadium (III) chloride ( $\text{VCl}_3$ , 97.0%), ammonium fluoride ( $\text{NH}_4\text{F}$ ,  $\geq 98.0\%$ ), and tellurium powder (99.8%) were purchased from Sigma–Aldrich Co., St. Louis, MO, USA. Urea ( $\text{NH}_2\text{CONH}_2$ ,  $\geq 99.0\%$ ), ethanol (99.5%), and nitric acid ( $\text{HNO}_3$ , 60.0%) were obtained from Samchun Co. Ltd., Seoul, Korea. All chemicals were of analytical grade and were used without further purification. Deionized (DI) water purified through a Millipore-Q system was used to form aqueous solutions during the experiment.

#### **Electrochemical characterization**

##### **Calculation of potential vs. RHE:**

As we measure the potentials of the working electrodes in reference to the Ag/AgCl electrode, it is necessary to convert the working potential with respect to the reversible hydrogen electrode (RHE) using standard calibrations as described by the Nernst equation:

$$E_{RHE} = E_{Ag/AgCl} + 0.0596 \times pH + E_{Ag/AgCl}^{\circ} \quad (1)$$

where  $E_{RHE}$  = calculated potential vs. RHE,  $E_{Ag/AgCl}$  = measured potential vs. Ag/AgCl,  $E_{Ag/AgCl}^{\circ}$  = standard electrode potential of Ag/AgCl electrode (0.197 V at 25 °C), and pH = 13.5-14 for 1 M KOH.

#### **iR correction:**

The potential values obtained after LSV measurements were iR corrected using the following equation.

$$E_{iR \text{ corrected}} = E_{(vs. RHE)} - i \times R_s \quad (2)$$

where  $i$  = current density  $R_s$  = resistance of the electrolytic solution (obtained from the EIS Nyquist plot).

#### **Overpotential ( $\eta$ ) calculation:**

The overpotential of electrocatalysts at a particular current density can be calculated as follows:

$$\eta_{OER} = E_{RHE} - 1.23 \text{ V} \quad (3)$$

$$\eta_{HER} = E_{RHE} - 0 \text{ V} \quad (4)$$

#### **Tafel slope:**

The reaction kinetics of the electrocatalyst were analyzed from the following Tafel equation:

$$\eta = a + b \log j \quad (5)$$

where  $\eta$ ,  $b$ , and  $j$  are the overpotential, Tafel slope, and current density, respectively. The Tafel slope represents the inherent quality of electrocatalysts, especially addressing the kinetics of the reaction.

#### **Electrochemically active surface area (ECSA):**

$$ECSA = C_{dl}/C_s \quad (6)$$

where,  $C_{dl}$  and  $C_s$  represent the electrical double layer capacitance and specific capacitance of the electrode surface, respectively. The ECSA is directly proportional to  $C_{dl}$ .

### Calculation of Faradic efficiency ( $\eta^F$ ):

The Faradaic efficiency ( $\eta^F$ ) of the alkaline electrolyzer, utilizing V-CoTe<sub>2</sub>/MoTe<sub>2</sub>@CC as a bifunctional electrocatalyst was assessed by measuring the volumes of evolved H<sub>2</sub> and O<sub>2</sub> at the cathode and anode, respectively, in a lab-made H-cell. The H-cell electrolyzer was operated at a constant current density of 10 mA cm<sup>-2</sup> for up to 120 minutes. The theoretical volumes of evolved H<sub>2</sub> and O<sub>2</sub> gases were estimated using Faraday's law:

$$V_{Theoretical} = \frac{IRTt}{PzF} \quad (7)$$

$V_{Theoretical}$  = Theoretical volume of gas evolution

$I$  = operating current density (mA cm<sup>-2</sup>)

$R$  = universal gas constant (0.0821 atm. L mol<sup>-1</sup> K<sup>-1</sup>)

$t$  = operating time in seconds (s)

$T$  = temperature on the Kelvin scale (K)

$p$  = pressure (atm.)

$z$  = number of electrons involved in the production of 1 mole of O<sub>2</sub> ( $z = 4$ ) or H<sub>2</sub> ( $z = 2$ )

$F$  = Faraday's constant ( $F = 96,485 C$ )

$\eta^F$  can be determined from the following equation: the ratio of the exact volume of real gas ( $V_{Experimental}$ ) to the theoretical volume ( $V_{Theoretical}$ ) during the reaction.

$$\eta^F = \frac{V_{Experimental}}{V_{Theoretical}} * 100\% \quad (8)$$

where  $V_{Experimental}$  is the volume of O<sub>2</sub> and H<sub>2</sub> gas evolved under a pressure of 1 atm at 300 K upon applying a current density of 10 mA cm<sup>-2</sup>.

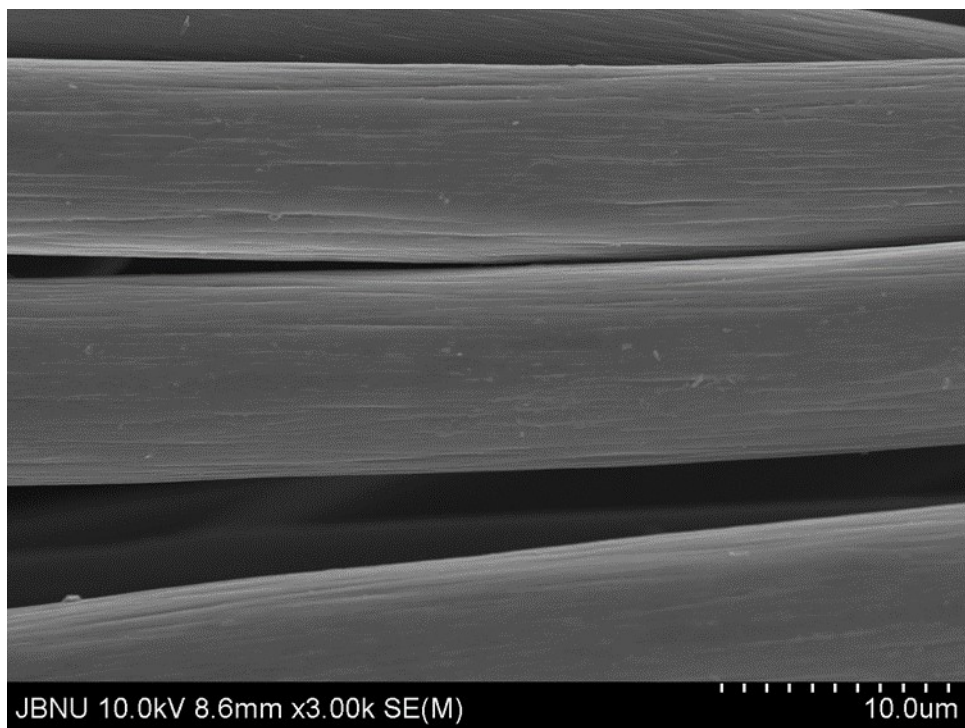

**Fig. S1.** FESEM image of bare carbon cloth (activated).

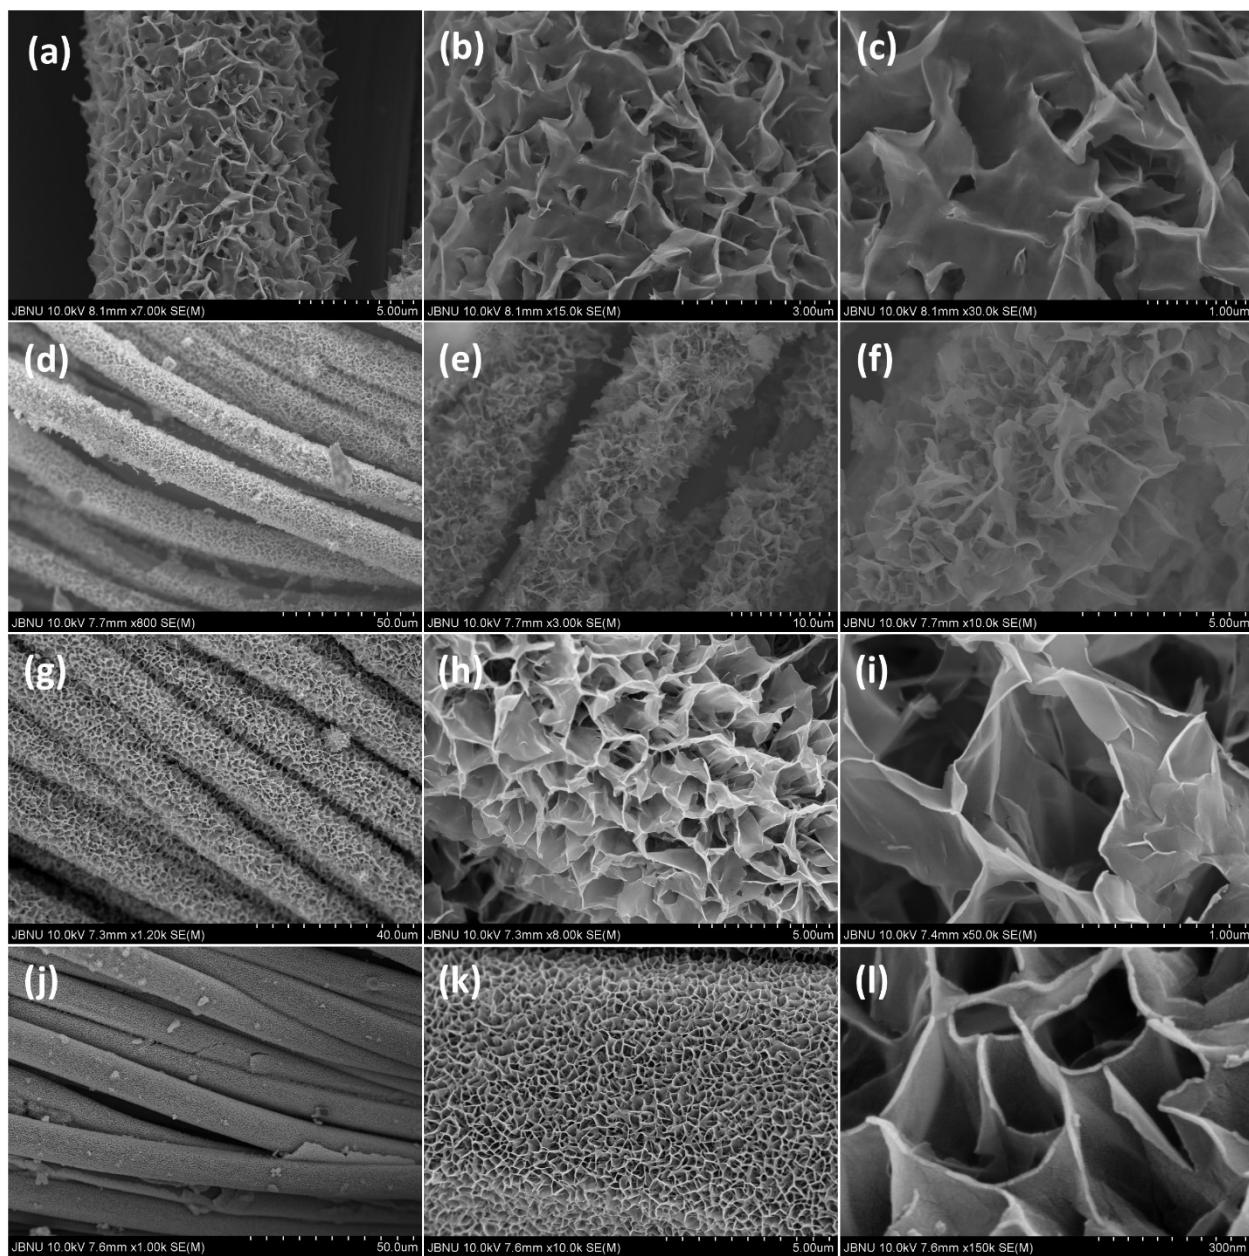

**Fig. S2.** FESEM image of V-CoMoOH@CC grown at different hydrothermal conditions. (a-c) 110 °C, 4 h, (d-f) 130 °C, 8 h (g-i) 130 °C, 5 h and (j-l) 120 °C, 6 h.

The hydrothermal conditions for the optimal growth of the V-CoMoOH nanosheets adhered to carbon clothes were determined by varying the heating temperature and holding time. V-CoMoOH nanosheets were not properly grown when heated to 110 °C for 4 h (**Fig. S2a-c**), possibly due to insufficient time and temperature for self-assembly. The V-CoMoOH nanosheets are not homogenous and the uniformity was destroyed upon heating at a relatively higher temperature (130 °C) for 8 h (**Fig. 2d-f**). The V-CoMoOH was grown homogenously at 130 °C, 5

h, however, the nanosheet size was not uniform throughout the material (**Fig. 2g-i**). Homogenously grown uniform nanosheets are clearly observed upon maintaining the hydrothermal condition of 120 °C for 6 h (**Fig. 2j-l**), which is considered an optimized condition.

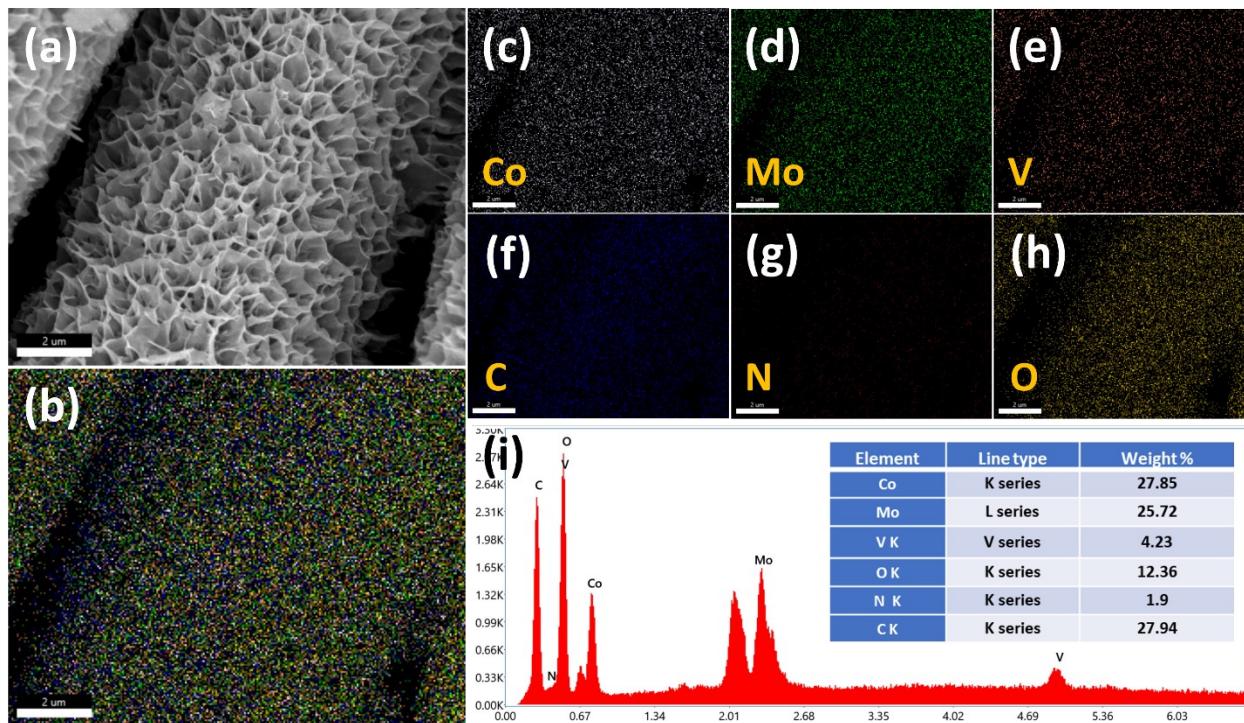

**Fig. S3.** EDX analysis of V-CoMoOH@CC. (a) Elemental mapping area, (b) superimposition of all elements, and elemental mapping spectra of (c) Co, (d) Mo, (e) V, (f) C (g) N, and (h) O, and (i) EDX spectrum (inset: element %).

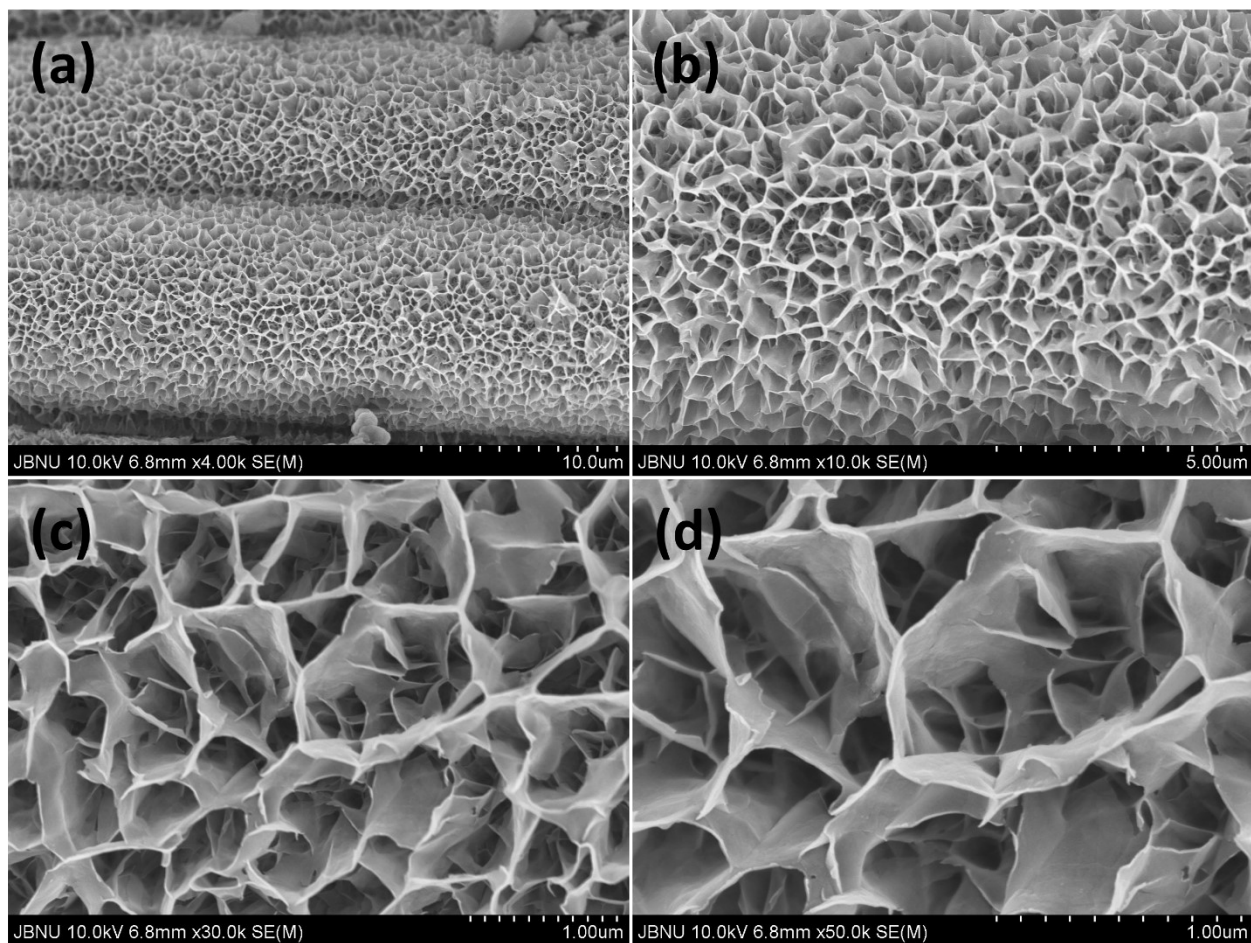

**Fig. S4. (a-d)** FESEM image of CoMoOH@CC at increasing magnifications.

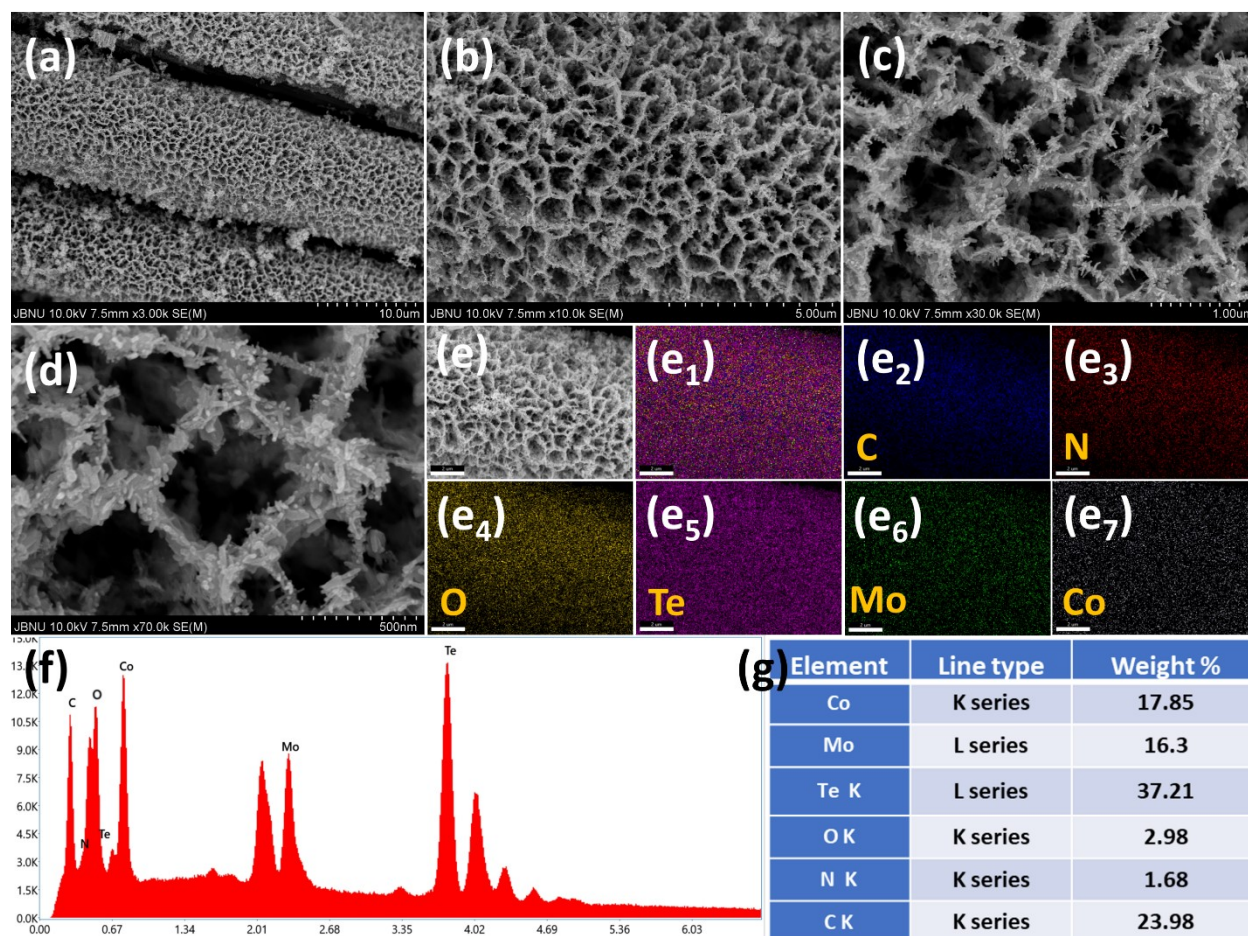

**Fig. S5.** (a-d) FESEM images of  $\text{CoTe}_2/\text{MoTe}_2@\text{CC}$  at different magnifications. EDX analysis of  $\text{V-CoCHH}@\text{MX}/\text{HCF}$ , (e) elemental mapping area, (e<sub>1</sub>) superimposition of all elements, and elemental mapping spectra of (e<sub>2</sub>) C, (e<sub>3</sub>) N, (e<sub>4</sub>) O, (e<sub>5</sub>) Te, (e<sub>6</sub>) Mo, and (e<sub>7</sub>) Co, (f) corresponding EDX spectrum, and (j) weight % of different elements.



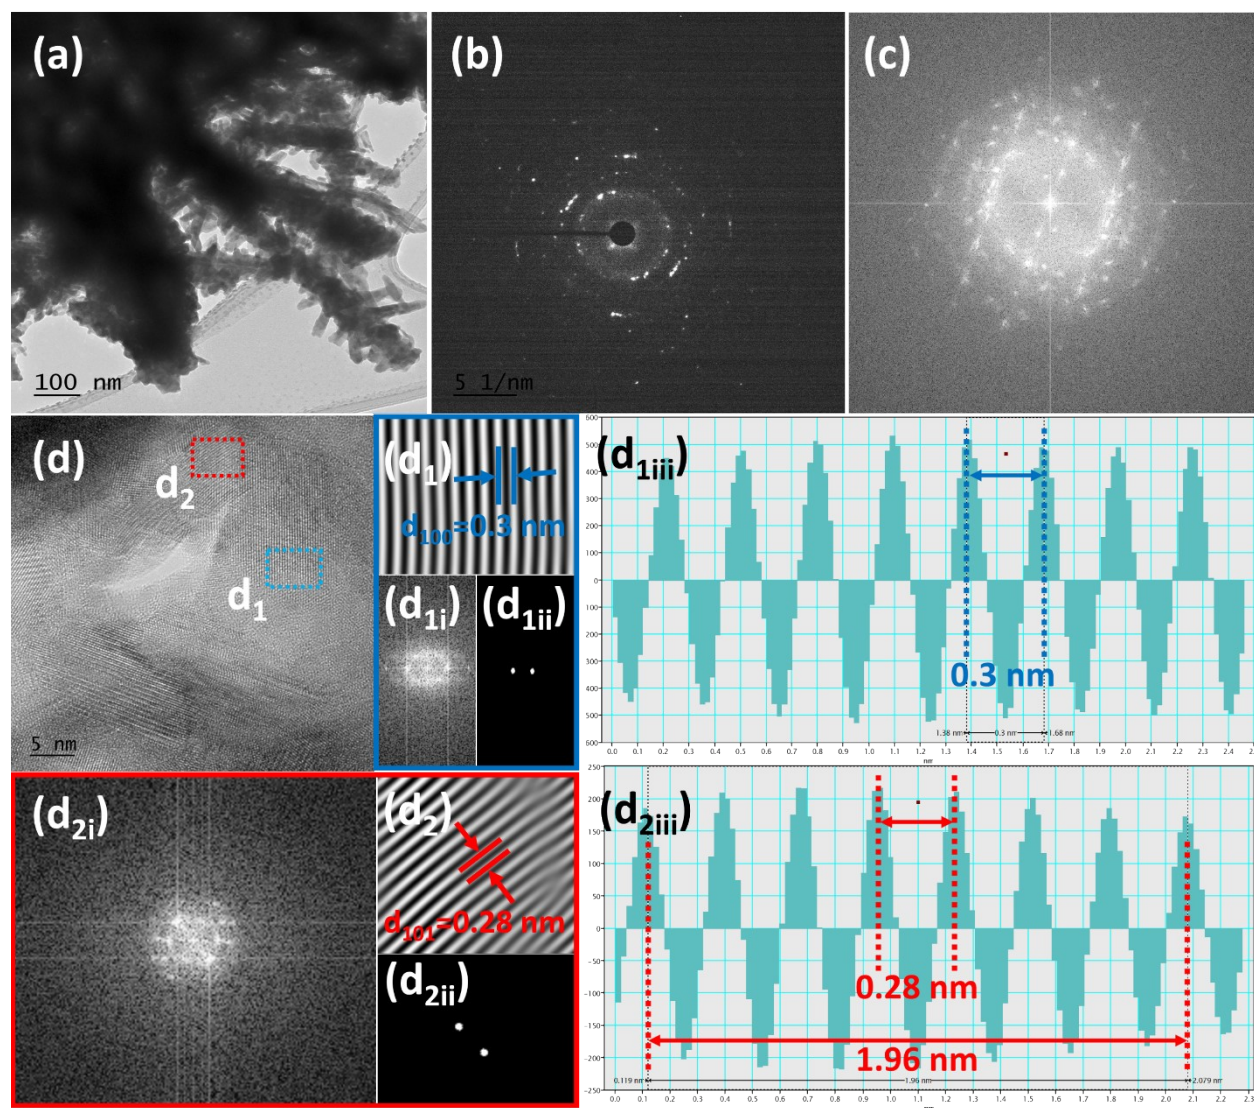

**Fig. S6.** TEM characterization of  $\text{CoTe}_2/\text{MoTe}_2@\text{CC}$ : (a) TEM image, (b) SAED patterns showing polycrystalline nature of the material, (c) corresponding FFT image, (d) HRTEM image, (d<sub>1</sub>) lattice fringes of 0.3 nm corresponding to (100) plane of  $\text{MoTe}_2$  derived from the selected region (blue dashed box) in (d), (d<sub>1i</sub>) FFTs of selected region before applying the mask, (d<sub>1ii</sub>) FFTs after applying the mask, (d<sub>1iii</sub>) corresponding live profile graph, (d<sub>2</sub>) lattice fringes of 0.28 nm corresponding to (101) plane of  $\text{CoTe}_2$  derived from the selected region (red dashed box) in (d), (d<sub>2i</sub>) FFTs of selected region before applying the mask, (d<sub>2ii</sub>) FFTs after applying the mask, (d<sub>2iii</sub>) corresponding live profile graph.

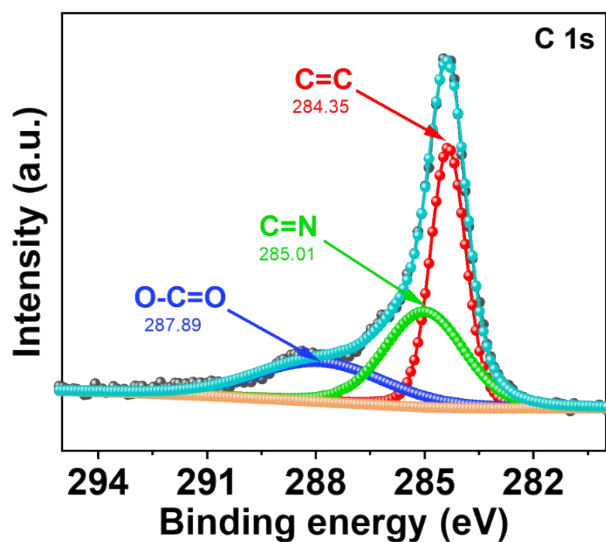

Fig. S7. High-resolution XPS spectra of V-CoTe<sub>2</sub>/MoTe<sub>2</sub>@CC deconvoluted for C 1s.

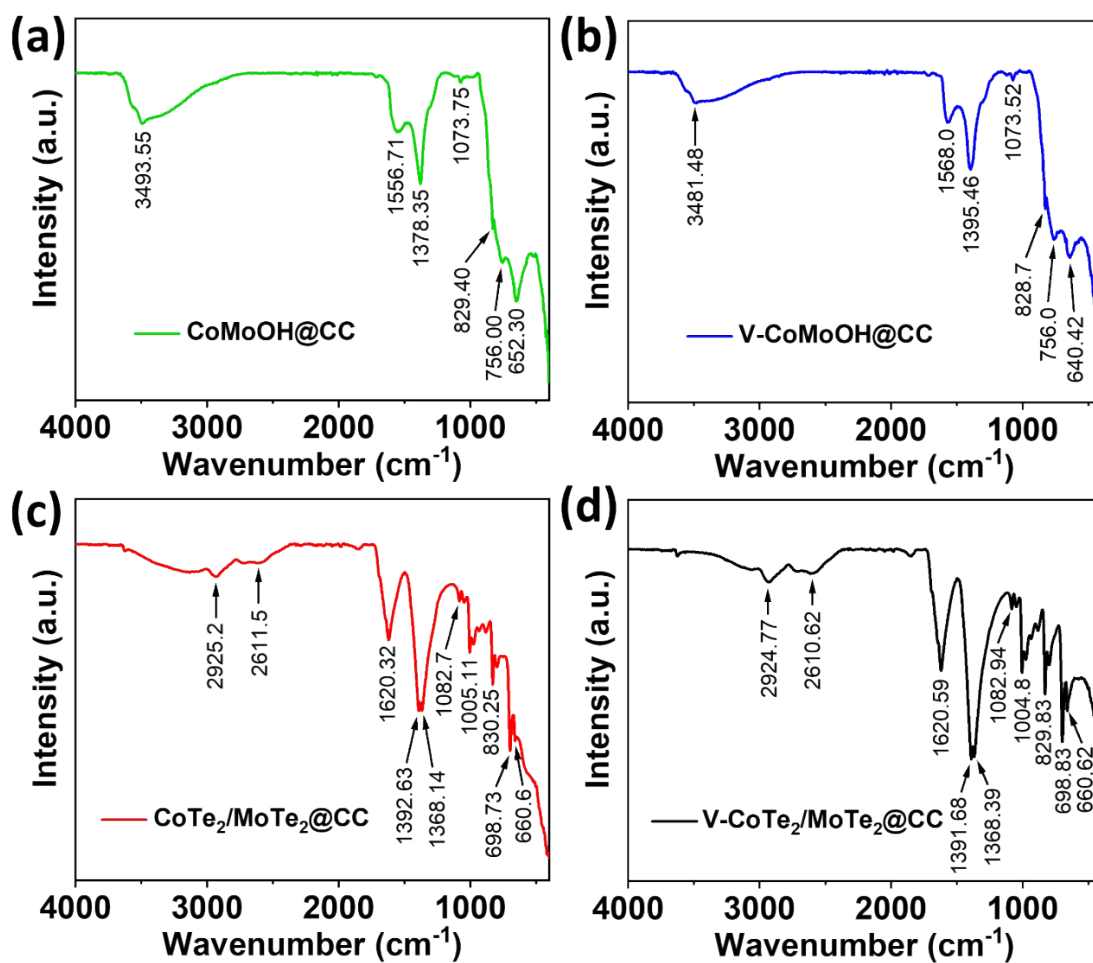

Fig. S8. FTIR spectra of (a) CoMoLDH@CC, (b) V-CoMoLDH@CC, (c) CoTe<sub>2</sub>/MoTe<sub>2</sub>@CC, and (d) V-CoTe<sub>2</sub>/MoTe<sub>2</sub>@CC.

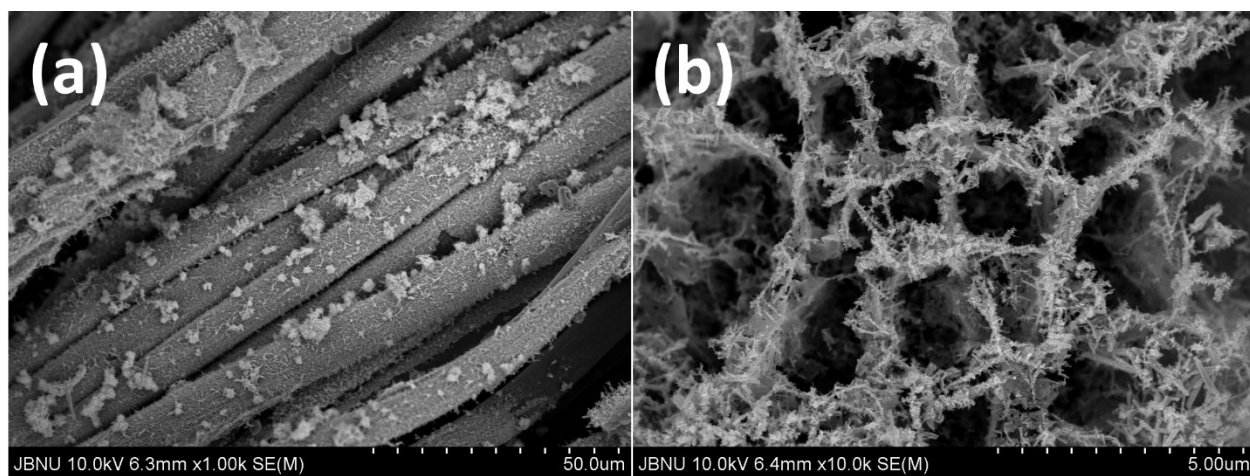

Fig. S9. (a,b) FESEM images of V-CoTe<sub>2</sub>/MoTe<sub>2</sub>@CC after HER test.

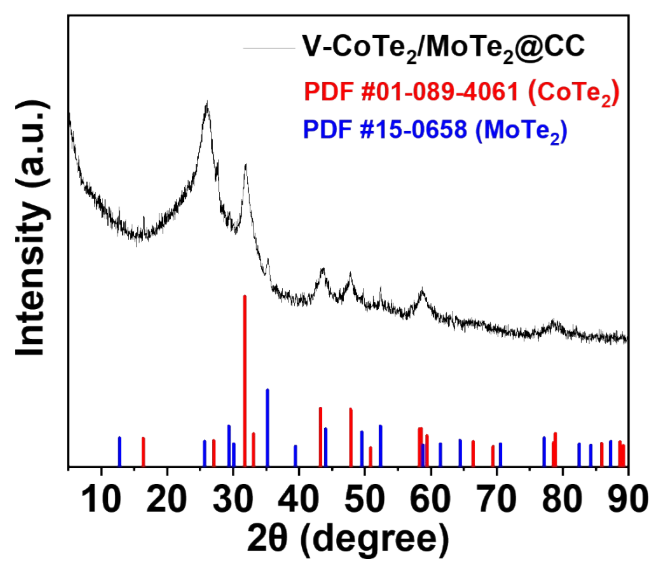

Fig. S10. XRD patterns of V-CoTe<sub>2</sub>/MoTe<sub>2</sub>@CC after HER test.

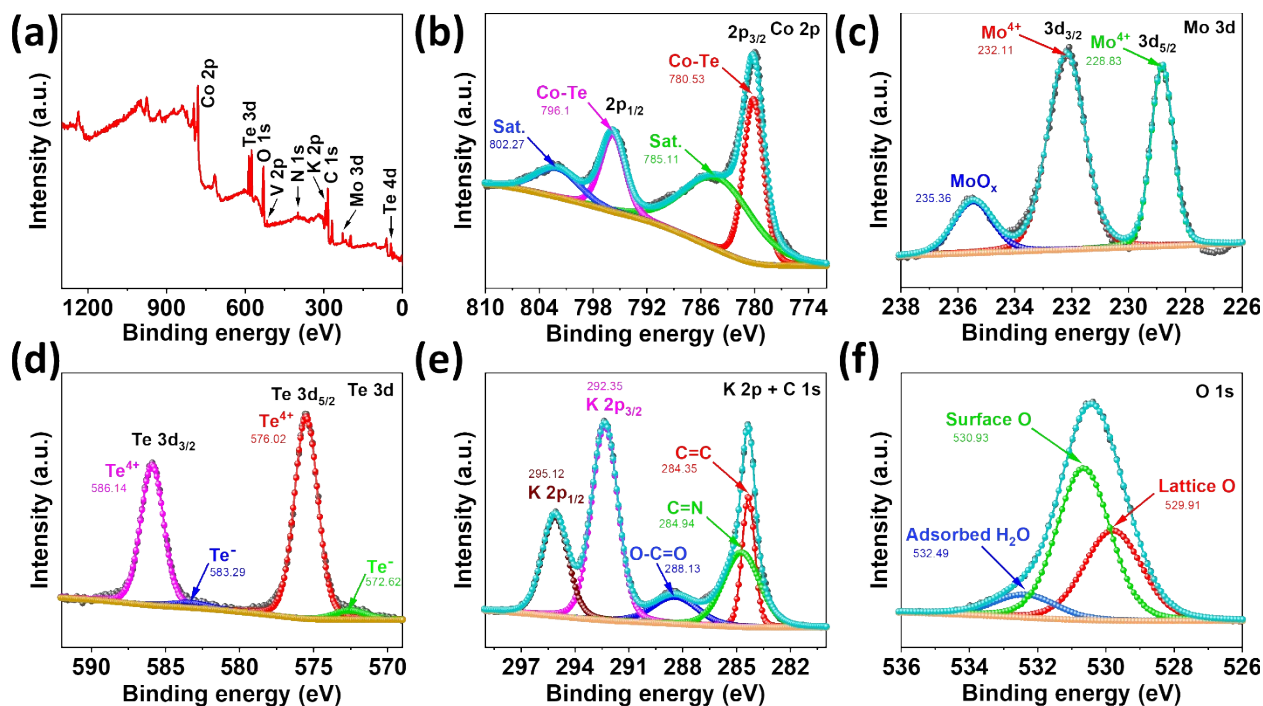

**Fig. S11.** XPS characterization of V-CoTe<sub>2</sub>/MoTe<sub>2</sub>@CC after HER test. (a) Low-resolution spectra, and high-resolution spectra of (b) Co 2p, (c) Mo 3d, (d) Te 3d, (e) K 2p + C 1s, and (f) O 1s.

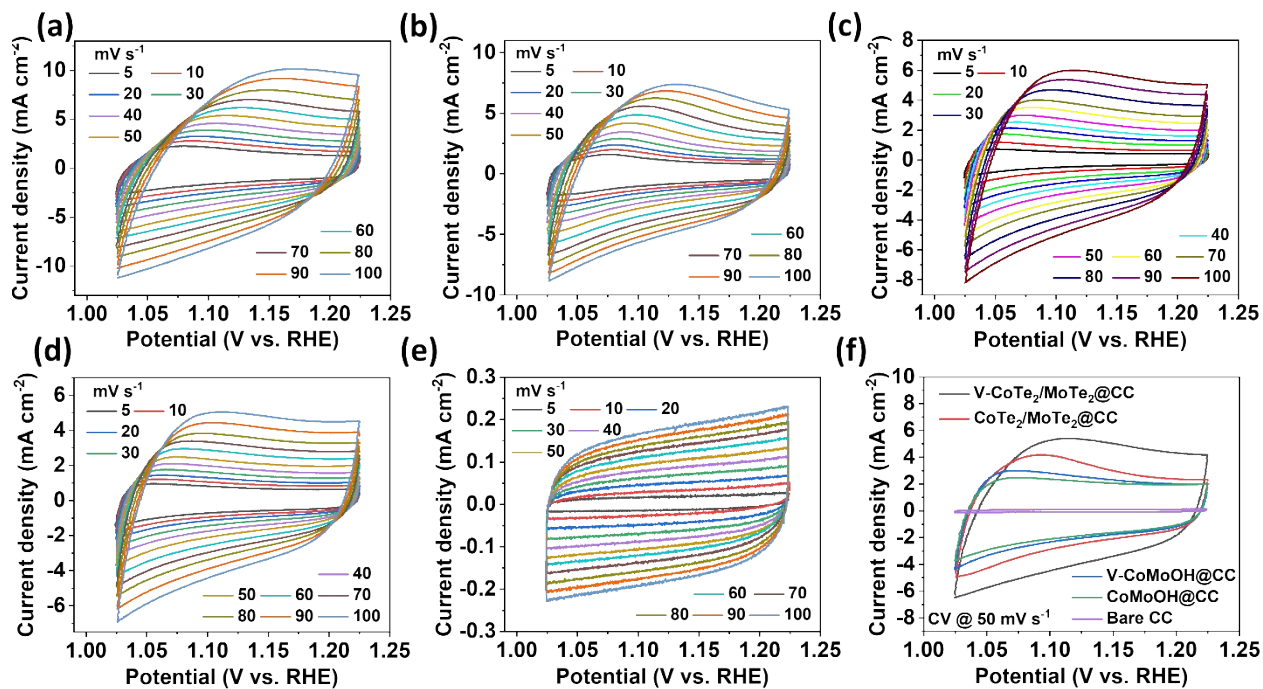

**Fig. S12.**  $C_{dl}$  calculation: CV curves of (a) V-CoTe<sub>2</sub>/MoTe<sub>2</sub>@CC, (b) CoTe<sub>2</sub>/MoTe<sub>2</sub>@CC, (c) V-CoMoOH@CC, (d) CoMoOH@CC, and (e) bare carbon cloth at scan rate from 5 to 100 mV s<sup>-1</sup>, (f) V-CoTe<sub>2</sub>/MoTe<sub>2</sub>@CC, CoTe<sub>2</sub>/MoTe<sub>2</sub>@CC, V-CoMoOH@CC, CoMoOH@CC, and Bare CC at 50 mV s<sup>-1</sup>.

and (f) CV curves of different electrodes at  $50 \text{ mV s}^{-1}$  in 1 M KOH solution for OER.

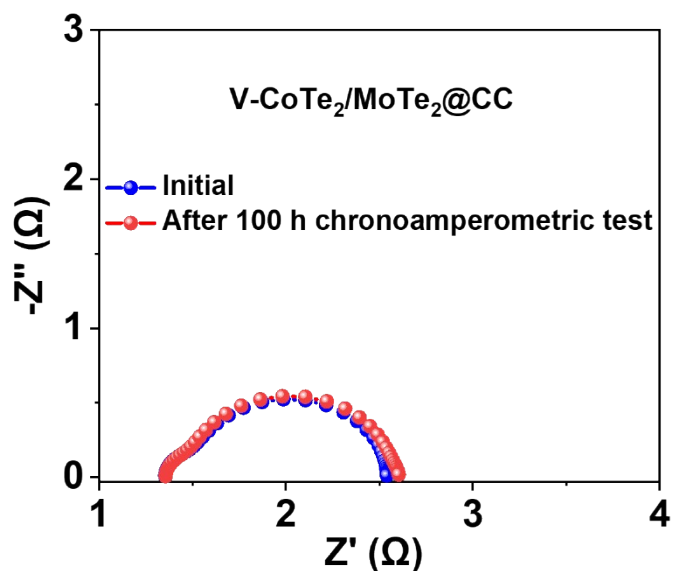

**Fig. S13.** Nyquist plot of V-CoTe<sub>2</sub>/MoTe<sub>2</sub>@CC before and after OER stability test.

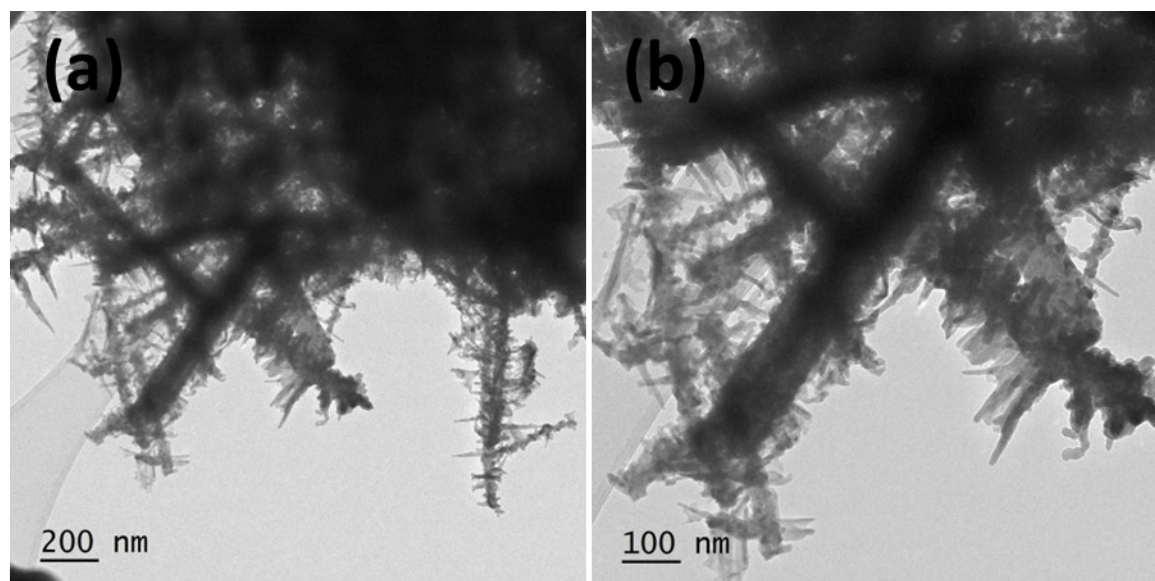

**Fig. S14.** (a,b) TEM images of V-CoTe<sub>2</sub>/MoTe<sub>2</sub>@CC after OER electrolysis in 1 M KOH for 100 h.

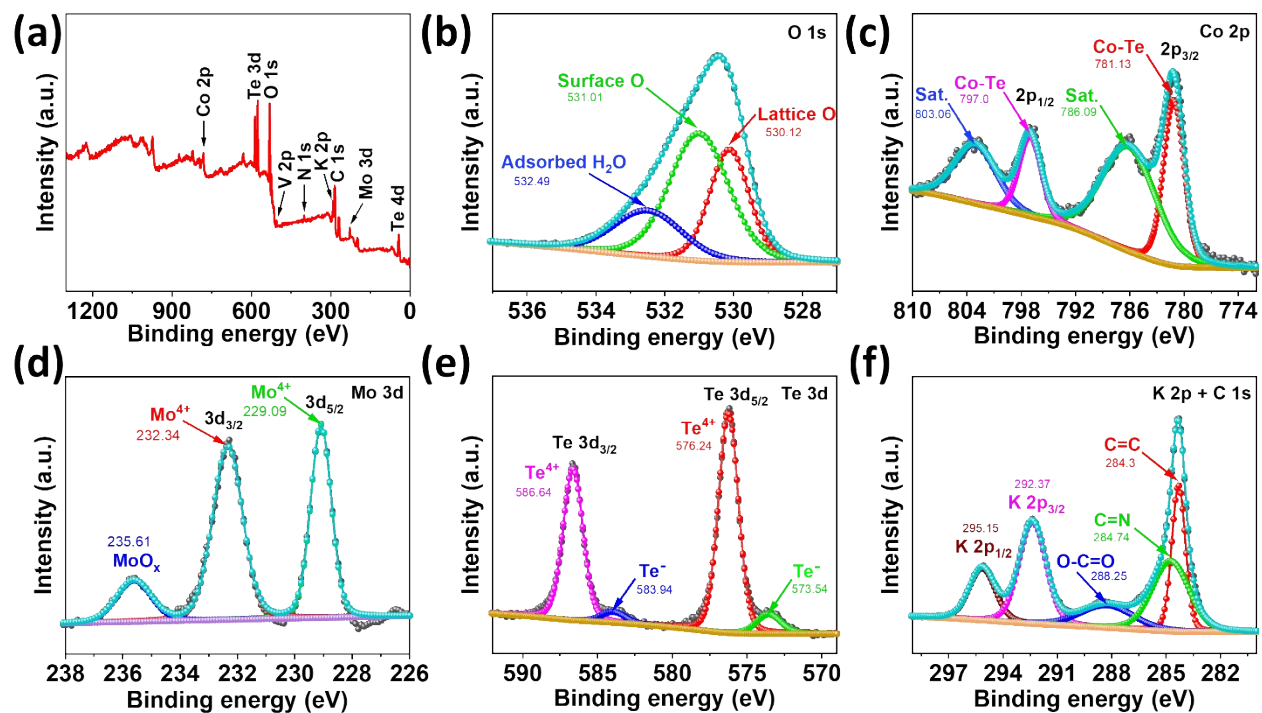

**Fig. S15.** XPS characterization of V-CoTe<sub>2</sub>/MoTe<sub>2</sub>@CC after OER test. (a) Low-resolution spectra, and high-resolution spectra of (b) O 1s, (c) Co 2p, (d) Mo 3d, (e) Te 3d, and (f) K 2p + C 1s.

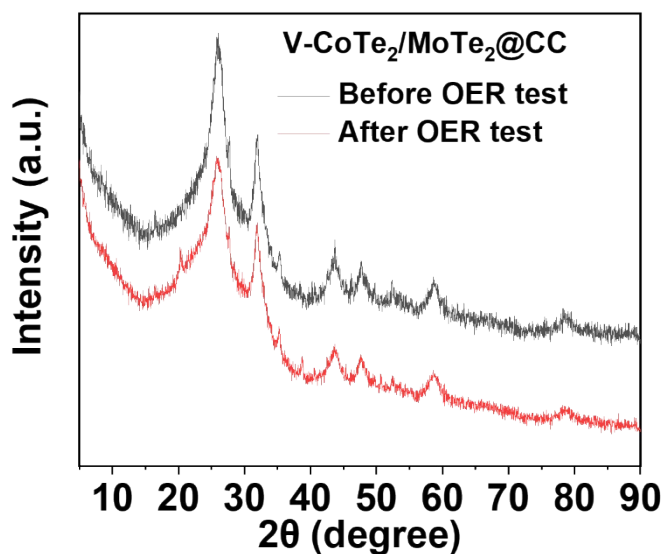

**Fig. S16.** XRD patterns of V-CoTe<sub>2</sub>/MoTe<sub>2</sub>@CC before and after OER test.

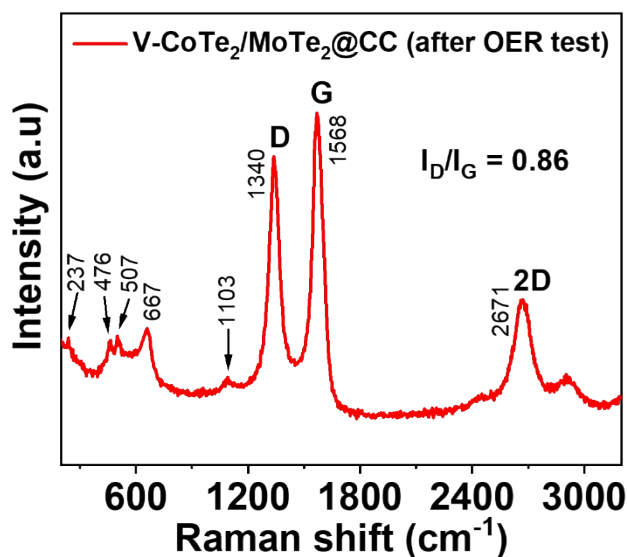

Fig. S17. Raman spectrum of V-CoTe<sub>2</sub>/MoTe<sub>2</sub>@CC after 100 h OER stability test.

Table S1: Atomic % of different elements observed in the XPS survey spectrum.

| Element | Atomic % of elements in                    |                                          |
|---------|--------------------------------------------|------------------------------------------|
|         | V-CoTe <sub>2</sub> /MoTe <sub>2</sub> @CC | CoTe <sub>2</sub> /MoTe <sub>2</sub> @CC |
| Co 2p   | 14.32                                      | 15.96                                    |
| Mo 3d   | 12.1                                       | 13.35                                    |
| V 2p    | 4.06                                       | 0.00                                     |
| Te 3d   | 38.89                                      | 36.81                                    |
| O 1s    | 6.56                                       | 6.08                                     |
| N 1s    | 2.41                                       | 2.3                                      |
| C 1s    | 21.66                                      | 24.5                                     |

Table S2: Elemental compositions of V-CoTe<sub>2</sub>/MoTe<sub>2</sub>@CC determined with ICP-OES analysis.

| Element | Atomic % |
|---------|----------|
| Co      | 23.89    |
| Mo      | 21.25    |
| V       | 7.47     |
| Te      | 47.39    |

**Table S3:** The BET surface area, the total pore volume, and the average pore diameter of different samples.

| Samples                                              | V-CoTe <sub>2</sub> /MoTe <sub>2</sub> @CC | CoTe <sub>2</sub> /MoTe <sub>2</sub> @CC |
|------------------------------------------------------|--------------------------------------------|------------------------------------------|
| BET surface area (m <sup>2</sup> g <sup>-1</sup> )   | 279.5                                      | 225.2                                    |
| Total pore volume (cm <sup>3</sup> g <sup>-1</sup> ) | 0.481                                      | 0.324                                    |
| Average pore diameter (nm)                           | 5.5                                        | 5.1                                      |

**Table S4.** Comparison table for HER performance with recently reported similar electrocatalysts.

| S.N. | Electrocatalysts                                               | substrate           | Electrolyte    | Overpotential @ 10 mA cm <sup>-2</sup> (mV) | Tafel slope (mV dec <sup>-1</sup> ) | Ref.             |
|------|----------------------------------------------------------------|---------------------|----------------|---------------------------------------------|-------------------------------------|------------------|
| 1.   | Co <sub>6</sub> Mo <sub>6</sub> C/MoC/Co                       | nickel foam         | 1 M KOH        | 52                                          | 54                                  | 1                |
| 2.   | Co <sub>5</sub> Mo <sub>10</sub> S <sub>x</sub> /CC            | carbon cloth        | 1 M KOH        | 36                                          | 56                                  | 2                |
| 5.   | Te-CoMoO <sub>3</sub> @C                                       | carbon matrix       | 1 M KOH        | 76                                          | -                                   | 3                |
| 6.   | Co <sub>0.677</sub> V <sub>0.33</sub> P@CC                     | carbon cloth        | 1 M KOH        | 77                                          | -                                   | 4                |
| 7.   | CoTe <sub>2</sub> /CoP                                         | Ti mesh             | 1 M KOH        | 80                                          | 57                                  | 5                |
| 8.   | CoMoVLDH/NF                                                    | nickel foam         | 1 M KOH        | 150                                         | 182                                 | 6                |
| 9.   | CC/MOF-CoSe <sub>2</sub> @MoSe <sub>2</sub>                    | carbon cloth        | 1 M KOH        | 109.87                                      | 68.91                               | 7                |
| 10.  | MoS <sub>2</sub> @Co <sub>1.11</sub> Te <sub>2</sub> /Co-NCD-T | nickel foam         | 1 M KOH        | 124                                         | 49                                  | 8                |
| 11.  | SeMoTe                                                         | nickel foam         | 1 M KOH        | 85                                          | 70                                  | 9                |
| 12.  | Co <sub>1.11</sub> Te <sub>2</sub> /Te (Te-Co-3)               | nickel foam         | 1 M KOH        | 135                                         | 56                                  | 10               |
| 13.  | o-CoSe <sub>2</sub> /c-CoSe <sub>2</sub> /MoSe <sub>2</sub>    | carbon cloth        | 1 M KOH        | 112                                         | 96.9                                | 11               |
| 14.  | <b>V-CoTe<sub>2</sub>/MoTe<sub>2</sub>@CC</b>                  | <b>Carbon cloth</b> | <b>1 M KOH</b> | <b>79</b>                                   | <b>58.9</b>                         | <b>This work</b> |



**Table S5.** Comparison table for OER performance with recently reported similar electrocatalysts.

| S.N. | Electrocatalysts                                      | substrate           | Electrolyte    | Overpotential<br>@ 10 mA cm <sup>-2</sup><br>(mV) | Tafel slope<br>(mV dec <sup>-1</sup> ) | Ref.             |
|------|-------------------------------------------------------|---------------------|----------------|---------------------------------------------------|----------------------------------------|------------------|
| 1.   | Co <sub>6</sub> Mo <sub>6</sub> C/MoC/Co              | nickel foam         | 1 M KOH        | 223                                               | 106                                    | 1                |
| 2.   | Co <sub>5</sub> Mo <sub>10</sub> S <sub>x</sub> /CC   | carbon cloth        | 1 M KOH        | 153                                               | 57.8                                   | 2                |
| 3.   | Te-CoMoO <sub>3</sub> @C                              | carbon matrix       | 1 M KOH        | 215                                               | 64                                     | 3                |
| 4.   | Co <sub>0.677</sub> V <sub>0.33</sub> P@CC            | carbon cloth        | 1 M KOH        | 290                                               | 55.59                                  | 4                |
| 5.   | CoTe <sub>2</sub> /CoP                                | Ti mesh             | 1 M KOH        | 260                                               | 89                                     | 5                |
| 6.   | CoMoVLDH/NF                                           | nickel foam         | 1 M KOH        | 270                                               | 106                                    | 6                |
| 7.   | Co <sub>1.11</sub> Te <sub>2</sub> /Te                | nickel foam         | 1 M KOH        | 261                                               | 52.6                                   | 10               |
| 8.   | Co <sub>0.50</sub> Mo <sub>0.50</sub> Te <sub>2</sub> | nickel foam         | 1 M KOH        | 160                                               | 62                                     | 12               |
| 9.   | CoO@S-CoTe                                            | nickel foam         | 1 M KOH        | 246                                               | 56                                     | 13               |
| 10.  | S-CoTe/CC                                             | carbon cloth        | 1 M KOH        | 257                                               | 63                                     | 14               |
| 11.  | CoTe                                                  | glassy carbon       | 1 M KOH        | 316                                               | 86                                     | 15               |
| 12.  | <b>V-CoTe<sub>2</sub>/MoTe<sub>2</sub>@CC</b>         | <b>carbon cloth</b> | <b>1 M KOH</b> | <b>249</b>                                        | <b>57.7</b>                            | <b>This work</b> |

**Table S6.** Comparison table for overall full cell water-splitting performance with recently reported similar electrocatalysts.

| S.N. | Electrocatalysts                 | substrate   | Electrolyte | Cell Voltage<br>@ 10 mA cm <sup>-2</sup><br>(V) | Ref. |
|------|----------------------------------|-------------|-------------|-------------------------------------------------|------|
| 1.   | Co-Mo-0.125-6N // Co-Mo-0.125-6N | nickel foam | 1 M KOH     | 1.53                                            | 1    |

|     |                                                                                                                                |                     |                |             |                  |
|-----|--------------------------------------------------------------------------------------------------------------------------------|---------------------|----------------|-------------|------------------|
| 2.  | Co <sub>5</sub> Mo <sub>10</sub> S <sub>x</sub> /CC //<br>Co <sub>5</sub> Mo <sub>10</sub> S <sub>x</sub> /CC                  | carbon cloth        | 1 M KOH        | 1.51        | 2                |
| 4.  | Te-CoMoO <sub>3</sub> @C // Te-<br>CoMoO <sub>3</sub> @C                                                                       | carbon matrix       | 1 M KOH        | 1.54        | 3                |
| 5.  | Co <sub>0.677</sub> V <sub>0.33</sub> P@CC //<br>Co <sub>0.677</sub> V <sub>0.33</sub> P@CC                                    | carbon cloth        | 1 M KOH        | 1.61        | 4                |
| 7.  | CoMoVLDH/NF //<br>CoMoVLDH/NF                                                                                                  | nickel foam         | 1 M KOH        | 1.61        | 6                |
| 8.  | CC/MOF-CoSe <sub>2</sub> @MoSe <sub>2</sub> //<br>CC/MOF-CoSe <sub>2</sub> @MoSe <sub>2</sub>                                  | carbon cloth        | 1 M KOH        | 1.53        | 7                |
| 6.  | Co <sub>1.11</sub> Te <sub>2</sub> /Te (Te-Co-3) //<br>Co <sub>1.11</sub> Te <sub>2</sub> /Te (Te-Co-3)                        | nickel foam         | 1 M KOH        | 1.56        | 10               |
| 9.  | o-CoSe <sub>2</sub> /c-CoSe <sub>2</sub> /MoSe <sub>2</sub> // o-<br>CoSe <sub>2</sub> /c-CoSe <sub>2</sub> /MoSe <sub>2</sub> | carbon cloth        | 1 M KOH        | 1.63        | 11               |
| 3.  | Co <sub>0.50</sub> Mo <sub>0.50</sub> Te <sub>2</sub> //<br>Co <sub>0.50</sub> Mo <sub>0.50</sub> Te <sub>2</sub>              | nickel foam         | 1 M KOH        | 1.39        | 12               |
| 10. | <b>V-CoTe<sub>2</sub>/MoTe<sub>2</sub>@CC // V-<br/>CoTe<sub>2</sub>/MoTe<sub>2</sub>@CC</b>                                   | <b>carbon cloth</b> | <b>1 M KOH</b> | <b>1.51</b> | <b>This work</b> |

## References:

1. X. Zhang, A. Wu, D. Wang, Y. Jiao, H. Yan, C. Jin, Y. Xie and C. Tian, *Applied Catalysis B: Environmental*, 2023, **328**, 122474.
2. Y. Lu, X. Guo, L. Yang, W. Yang, W. Sun, Y. Tuo, Y. Zhou, S. Wang, Y. Pan, W. Yan, D. Sun and Y. Liu, *Chemical Engineering Journal*, 2020, **394**, 124849.
3. L. Wang, H. Yu, S. Zhao, H. Ma, L. Li, F. Hu, L. Li, H. Pan, K. M. El-Khatib and S. Peng, *Inorganic Chemistry Frontiers*, 2022, **9**, 3788-3796.
4. H. Han, F. Yi, S. Choi, J. Kim, J. Kwon, K. Park and T. Song, *Journal of Alloys and Compounds*, 2020, **846**, 156350.
5. L. Yang, X. Cao, X. Wang, Q. Wang and L. Jiao, *Applied Catalysis B: Environmental*, 2023, **329**, 122551.
6. J. Bao, Z. Wang, J. Xie, L. Xu, F. Lei, M. Guan, Y. Zhao, Y. Huang and H. Li, *Chemical Communications*, 2019, **55**, 3521-3524.
7. S. J. Patil, N. R. Chodankar, S.-K. Hwang, P. A. Shinde, G. Seeta Rama Raju, K. Shanmugam Ranjith, Y. S. Huh and Y.-K. Han, *Chemical Engineering Journal*, 2022, **429**, 132379.
8. Z. Liu, S. Yun, M. Sun, J. Dang, Y. Zhang, Y. Wang, C. Dang, Y. Deng and D. Qiao, *Materials Today Nano*, 2022, **20**, 100274.
9. D. Vikraman, S. Hussain, I. Rabani, A. Feroze, M. Ali, Y.-S. Seo, S.-H. Chun, J. Jung and H.-S. Kim, *Nano Energy*, 2021, **87**, 106161.

10. G. Wang, C. Hua, W. Chen, H. Fan, P. Feng and Y. Zhu, *Electrochimica Acta*, 2023, **447**, 142133.
11. Y. Ji, W. Luo, Y. Liu, Z. He, N. Cheng, Z. Zhang, X. Qi, J. Zhong and L. Ren, *Materials Today Chemistry*, 2022, **23**, 100724.
12. D. Vikraman, S. Hussain, Z. Abbas, K. Karuppasamy, P. Santhoshkumar, J. Jung and H.-S. Kim, *ACS Applied Materials & Interfaces*, 2023, **15**, 26893-26909.
13. X. Wang, Z. Mao, X. Mao, X. Hu, F. Gao, M. Gao, Q.-L. Wu, X. Lyu, A. Du, X. Xu, Y. Jia and L. Wang, *Advanced Science*, 2023, **10**, 2206204.
14. L. Yang, H. Qin, Z. Dong, T. Wang, G. Wang and L. Jiao, *Small*, 2021, **17**, 2102027.
15. D. A. Alshammari, Y. M. Riyad, S. Aman, N. Ahmad, H. M. Tahir Farid and Z. M. El-Bahy, *Journal of Electroanalytical Chemistry*, 2023, **945**, 117701.
